# Supplementary material for: NRF2 and Bip Interconnection Mediates Resistance to the Organometallic Ruthenium-Cymene Bisdemethoxycurcumin Complex Cytotoxicity in Colon Cancer Cells
Source: MDPI journal article supplement (doi:10.3390/biomedicines11020593), 2023-02-16
Supplement: s1 [file s1]

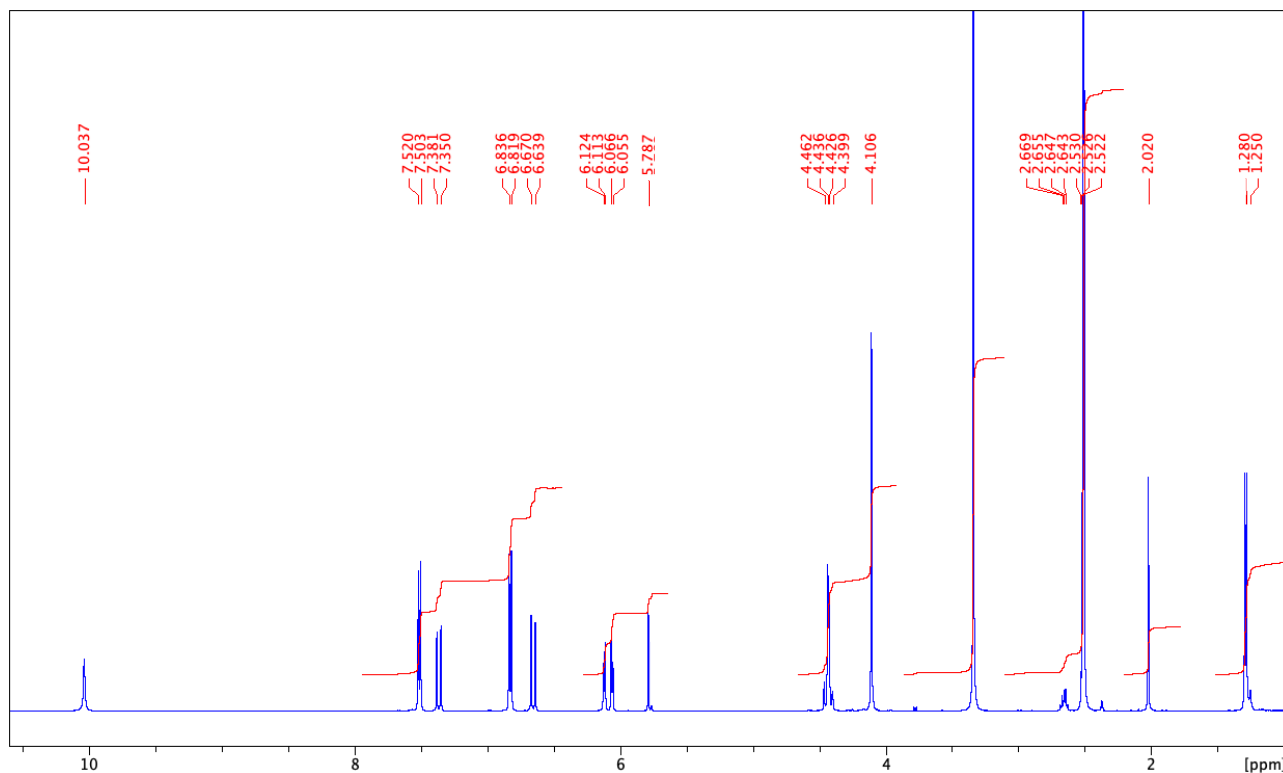

Figure S1A. <sup>1</sup>H NMR of Ru-bdcurc in DMSO-*d*<sub>6</sub> at 293 K.

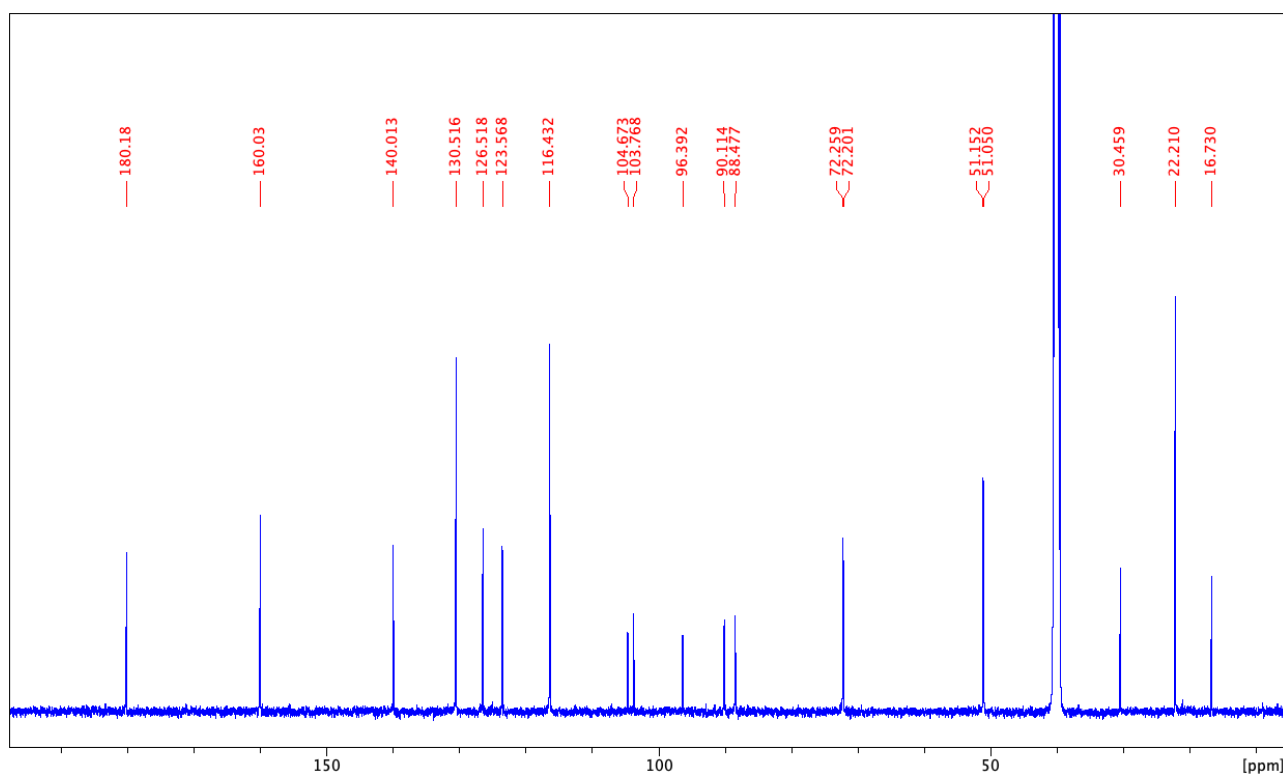

Figure S1B. <sup>13</sup>C{<sup>1</sup>H} NMR of Ru-bdcurc in DMSO-*d*<sub>6</sub> at 293 K.

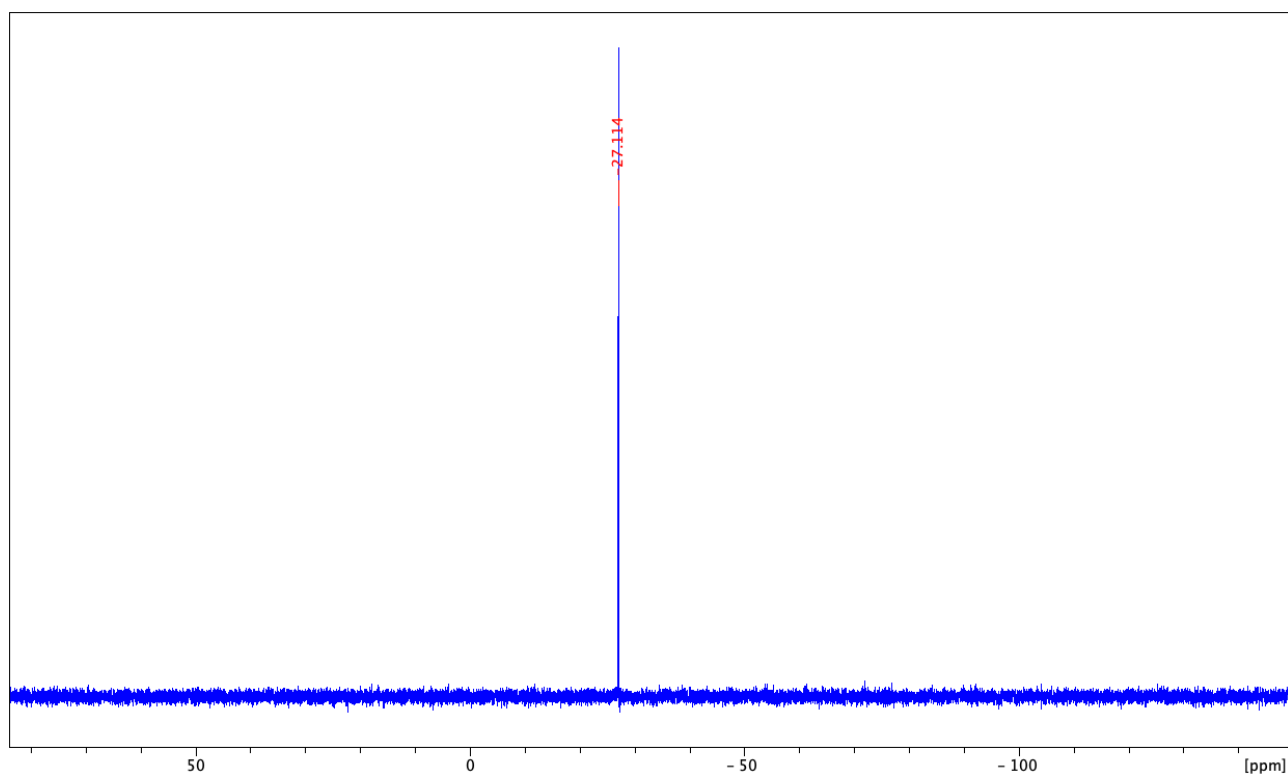

**Figure S1C.**  $^{31}\text{P}\{^1\text{H}\}$  NMR of Ru-bdcurec in  $\text{DMSO-}d_6$  at 293 K.
